# Supplementary material for: Transcriptome Sequencing of Dianthus spiculifolius and Analysis of the Genes Involved in Responses to Combined Cold and Drought Stress
Source: Int J Mol Sci. 2017 Apr 17;18(4):849. doi: 10.3390/ijms18040849 (PMC5412433; doi:10.3390/ijms18040849)
Supplement: Supplementary file 1 [file ijms-18-00849-s001.xls]

## Sheet: Table S1
Table S1. Up-regulated DEGs in cold-, drought- or combined cold and drought-treated samples
Transcript_id	Length(bp)	log2(CT/CK)	FDR	log2(DT/CK)	FDR	log2(CTDT/CK)	FDR	Gene_primary_name	Gene_description	Gene_ontology(biological process)	Gene_ontology(molecular function)	Gene_ontology(cellular compoment)	Blast_evalue
Ds82480_c0_g1_i1	742	3.1568	7.99961e-18	3.36733	3.12897e-21	4.97229	8.06862e-09	LEA11_HELAN	11 kDa late embryogenesis abundant protein	GO:0009790;	-	-	2e-09
Ds21949_c0_g1_i7	2752	1.06367	6.00461e-05	1.65966	6.77926e-11	1.68148	0.00834726	HSP17_ARATH	17.4 kDa class I heat shock protein	GO:0009408;	-	GO:0005737;	1e-50
Ds57647_c0_g1_i3	1132	3.2135	3.87518e-31	1.16124	0.000118972	4.03556	1.76073e-07	HS174_ORYSJ	17.4 kDa class I heat shock protein	GO:0042542;GO:0009408;GO:0045471;GO:0046688;GO:0046686;GO:0046685;	-	GO:0005737;	9e-21
Ds6993_c0_g1_i2	2030	2.15812	1.18251e-21	1.3253	3.03542e-09	1.86082	0.00371416	DBR_TOBAC	2-alkenal reductase (NADP(+)-dependent)	-	GO:0008270;GO:0016491;	-	1e-151
Ds41438_c0_g1_i2	1221	1.89845	0.000142624	2.4409	1.90522e-07	2.3438	0.00471303	KASC2_ARATH	3-oxoacyl-[acyl-carrier-protein] synthase II, chloroplastic	GO:0006636;GO:0006633;GO:0009793;GO:0009631;	GO:0004315;	GO:0009536;GO:0009570;GO:0009507;	3e-49
Ds59750_c0_g1_i4	2016	2.87306	4.39488e-34	0.980225	2.99346e-05	2.77886	5.22116e-05	UGT6_CATRO	7-deoxyloganetin glucosyltransferase	GO:1900994;	GO:0035251;	-	9e-120
Ds15578_c0_g1_i4	1847	2.81221	2.05204e-35	1.94898	1.31639e-18	3.67953	4.29223e-07	10HGO_CATRO	8-hydroxygeraniol dehydrogenase	-	GO:0008270;GO:0016491;	-	2e-123
Ds56881_c0_g1_i1	2262	1.39003	0.00027273	2.33422	3.91525e-12	3.1994	1.6742e-05	NCED3_ARATH	9-cis-epoxycarotenoid dioxygenase NCED3, chloroplastic	GO:0009414;GO:0006970;GO:0042538;GO:0009688;	GO:0046872;GO:0045549;	GO:0009535;GO:0009570;	0
Ds27076_c0_g1_i3	2705	1.6703	1.62571e-10	1.62296	4.27958e-10	1.35509	0.0306059	AATPI_ARATH	AAA-ATPase At5g17760	-	GO:0016887;GO:0005524;	GO:0005886;GO:0016021;	6e-108
Ds5529_c0_g1_i3	3386	1.36752	1.37607e-05	1.49365	1.28421e-06	1.37011	0.0332932	AI5L3_ARATH	ABSCISIC ACID-INSENSITIVE 5-like protein 3	GO:0006351;GO:0009738;	GO:0003700;GO:0043565;GO:0003677;	GO:0005634;	1e-26
Ds38120_c0_g1_i1	1910	5.41539	3.26404e-100	3.07243	2.53097e-39	2.98983	1.86791e-05	ASR1_SOLLC	Abscisic stress-ripening protein 1	GO:0006950;	-	GO:0005634;	5e-07
Ds19007_c0_g1_i6	5518	0.845747	0.000134543	0.862393	9.15116e-05	1.75946	0.00433126	ALDO3_ARATH	Abscisic-aldehyde oxidase	GO:0009115;GO:0009851;GO:0009688;	GO:0004854;GO:0031625;GO:0016614;GO:0005506;GO:0050302;GO:0050660;GO:0009055;GO:0004031;GO:0010293;GO:0051537;	GO:0005829;	0
Ds4284_c0_g1_i2	7685	1.05391	5.5432e-07	0.817846	9.75227e-05	1.19975	0.0366661	ACC1_ARATH	Acetyl-CoA carboxylase 1	GO:0048367;GO:0048364;GO:0009735;GO:0010072;GO:0009933;GO:2001295;GO:0030497;GO:0009793;	GO:0046872;GO:0004075;GO:0005524;GO:0003989;	GO:0005886;GO:0005829;	0
Ds85217_c0_g1_i5	2916	1.41225	1.50558e-11	0.772499	0.000188494	1.27243	0.0321299	SAHH_MESCR	Adenosylhomocysteinase	GO:0006730;	GO:0004013;	-	0
Ds24010_c0_g1_i4	1728	3.65931	2.1476e-45	1.50129	1.69467e-08	2.96232	2.75677e-05	AKRC9_ARATH	Aldo-keto reductase family 4 member C9	GO:0009414;GO:0009636;GO:0009651;GO:0009409;GO:0055114;	GO:0016229;GO:0070401;GO:0004033;GO:0008106;	GO:0009507;	2e-103
Ds60663_c0_g1_i1	1734	1.73285	5.22111e-14	1.00862	1.24705e-05	1.70697	0.00784358	ANXD5_ARATH	Annexin D5	GO:0009414;GO:0009651;GO:0009639;GO:0009408;GO:0009409;GO:0009860;GO:0009846;GO:0009555;	GO:0005543;GO:0005544;GO:0005509;GO:0051015;	-	1e-82
Ds10804_c0_g1_i2	1711	0.812813	0.00585227	0.957225	0.000941827	2.28595	0.000816819	DUSKY_IPONI	Anthocyanidin 3-O-glucoside 2''-O-glucosyltransferase	GO:0043473;GO:0009718;	GO:0016758;	-	3e-119
Ds37437_c0_g1_i2	1905	1.73499	4.39918e-15	0.961609	1.20942e-05	1.38294	0.0258119	ARGI1_ARATH	Arginase 1, mitochondrial	GO:0000050;GO:0042742;GO:0006527;	GO:0050897;GO:0004053;	GO:0005739;GO:0009507;	2e-53
Ds24383_c0_g1_i2	1667	4.28383	8.05513e-30	2.44486	5.87626e-08	5.18875	1.38392e-09	DBR2_ARTAN	Artemisinic aldehyde Delta(11(13)) reductase	-	GO:0016628;GO:0010181;	GO:0005829;	2e-128
Ds84077_c0_g1_i2	1297	2.82522	1.76169e-17	2.90567	7.65983e-19	2.58002	0.00049434	AB19A_PRUPE	Auxin-binding protein ABP19a	GO:0009734;	GO:0045735;GO:0030145;	GO:0005618;GO:0048046;	1e-55
Ds52284_c0_g1_i2	1856	3.10802	8.35052e-18	1.55052	0.000267908	4.13676	1.85829e-07	IAA13_ARATH	Auxin-responsive protein IAA13	GO:0006351;GO:0009733;GO:0009734;	GO:0003700;	GO:0005634;	3e-09
Ds29060_c0_g1_i1	2865	2.3767	4.63481e-20	2.10506	4.68651e-16	2.09403	0.00147403	BAG6_ARATH	BAG family molecular chaperone regulator 6	GO:0010228;GO:0042542;GO:0009644;GO:0009408;GO:0010508;GO:0012502;GO:0009817;GO:0050832;GO:0006914;GO:0006915;	GO:0005516;	GO:0009506;	1e-41
Ds39359_c0_g1_i2	1256	2.07689	4.00882e-12	1.86939	4.10002e-10	1.46275	0.0360714	BAG6_ARATH	BAG family molecular chaperone regulator 6	GO:0010228;GO:0042542;GO:0009644;GO:0009408;GO:0010508;GO:0012502;GO:0009817;GO:0050832;GO:0006914;GO:0006915;	GO:0005516;	GO:0009506;	3e-05
Ds85781_c0_g2_i3	1548	2.67301	4.67112e-07	2.11836	8.39027e-05	4.46026	2.35958e-07	BBX32_ARATH	B-box zinc finger protein 32	GO:0006351;GO:0010200;GO:0006355;GO:0009909;GO:0010017;GO:0009640;GO:0045892;GO:0009785;	GO:0003700;GO:0046872;	GO:0005634;GO:0005737;	2e-18
Ds27990_c0_g1_i3	2748	2.08079	4.8045e-21	1.27152	5.58485e-09	1.27176	0.0339297	BAM1_ARATH	Beta-amylase 1, chloroplastic	GO:0005983;GO:0009414;	GO:0016161;	GO:0005634;GO:0005829;GO:0009507;	0
Ds10054_c0_g1_i1	1377	2.65739	2.96692e-20	3.08903	4.50498e-28	1.91387	0.005598	SWET1_ARATH	Bidirectional sugar transporter SWEET1	GO:0051260;GO:0034219;	GO:0051119;	GO:0005886;GO:0005887;GO:0005789;GO:0005783;	4e-76
Ds2741_c0_g1_i4	1444	8.28281	5.99836e-19	5.68143	0.000352487	7.89463	3.04942e-05	SWT16_ORYSJ	Bidirectional sugar transporter SWEET16	GO:0008643;GO:0034219;	GO:0051119;	GO:0005887;GO:0016021;	1e-30
Ds3121_c0_g1_i2	981	4.24066	8.426e-06	4.55751	1.75007e-07	3.60602	0.0350658	SWT1B_ORYSI	Bidirectional sugar transporter SWEET1b	GO:0034219;	GO:0051119;	GO:0005887;	2e-13
Ds49812_c0_g1_i4	1980	2.0721	1.4962e-12	1.09614	0.000406958	2.58901	0.000202078	CYSC_SPIOL	Bifunctional L-3-cyanoalanine synthase/cysteine synthase, mitochondrial	GO:0006534;GO:0006535;GO:0019499;	GO:0016740;GO:0050017;GO:0004124;	GO:0005739;	1e-122
Ds55044_c0_g1_i2	1293	1.98777	8.00829e-11	1.22741	0.00014544	1.94231	0.00578838	CDPK_SOYBN	Calcium-dependent protein kinase SK5	GO:0046777;GO:0018105;GO:0035556;GO:0009738;	GO:0004683;GO:0005516;GO:0009931;GO:0005509;GO:0005524;	GO:0005886;GO:0005737;	3e-16
Ds26169_c0_g1_i1	2451	2.06406	1.78457e-21	0.702202	0.00101045	1.85495	0.00333074	CIPK2_ORYSJ	CBL-interacting protein kinase 2	GO:0007165;	GO:0004674;GO:0005524;	-	1e-153
Ds42068_c0_g2_i2	2143	1.56993	3.51863e-08	2.07662	5.51438e-14	2.34116	0.000574409	CIPKP_ARATH	CBL-interacting serine/threonine-protein kinase 25	GO:0007165;GO:0050832;	GO:0004674;GO:0005524;	-	2e-141
Ds9626_c0_g1_i2	647	5.05379	4.83076e-25	3.97396	5.52588e-13	4.01838	8.9555e-05	CCR1_ARATH	Cinnamoyl-CoA reductase 1	GO:0009409;GO:0009809;GO:0007623;	GO:0050662;GO:0016621;	GO:0005829;	4e-07
Ds20983_c0_g1_i2	1856	4.21201	8.75843e-69	4.3346	3.62672e-72	3.13997	8.30752e-06	CCR2_ARATH	Cinnamoyl-CoA reductase 2	GO:0009409;GO:0009699;GO:0042754;GO:0006952;GO:0007623;	GO:0050662;GO:0016621;	-	4e-28
Ds4184_c0_g1_i1	4388	1.0061	0.000301707	1.26047	3.3803e-06	1.25532	0.0392504	CNGC2_ARATH	Cyclic nucleotide-gated ion channel 2	GO:0042391;GO:0071805;GO:0009626;GO:0007263;GO:0006952;GO:0098655;GO:0070588;	GO:0005242;GO:0005221;GO:0005222;GO:0030553;GO:0030552;GO:0005516;GO:0005262;	GO:0005886;GO:0005622;GO:0016021;	0
Ds20529_c0_g1_i4	1112	1.37563	4.42262e-07	2.38655	3.64471e-20	2.483	0.00045062	CYT1_ACTDE	Cysteine proteinase inhibitor 1	GO:0010951;GO:0006952;	GO:0004869;	GO:0005576;	2e-17
Ds15226_c0_g3_i2	759	4.04062	7.31697e-36	1.59435	2.92013e-05	3.16481	6.66876e-05	CYT12_ORYSJ	Cysteine proteinase inhibitor 12	GO:0006952;	GO:0004869;	GO:0005576;	1e-37
Ds72651_c0_g1_i2	1830	1.54259	4.88043e-05	1.7396	1.46092e-06	1.54988	0.0273191	C94A1_VICSA	Cytochrome P450 94A1	-	GO:0016705;GO:0004497;GO:0005506;GO:0020037;	GO:0016021;GO:0005789;	1e-121
Ds1844_c0_g1_i2	2814	3.19474	4.69448e-33	1.17204	4.13344e-05	3.80548	2.75607e-07	C7A29_PANGI	Cytochrome P450 CYP72A219	-	GO:0016705;GO:0004497;GO:0005506;GO:0020037;	GO:0016021;	7e-158
Ds72089_c0_g1_i3	1104	2.37367	6.58257e-08	2.04098	1.12694e-05	4.08924	6.78115e-07	C7A29_PANGI	Cytochrome P450 CYP72A219	-	GO:0016705;GO:0004497;GO:0005506;GO:0020037;	GO:0016021;	2e-32
Ds3834_c0_g1_i1	1354	1.5443	0.000206754	1.40375	0.00100613	1.91351	0.0102696	DREB3_ARATH	Dehydration-responsive element-binding protein 3	GO:0006351;GO:0045893;GO:0009873;	GO:0003700;GO:0043565;	GO:0005634;	4e-29
Ds21175_c0_g1_i3	1020	7.39885	1.99728e-87	2.48218	4.12442e-06	5.23612	9.48872e-09	COR47_ARATH	Dehydrin COR47	GO:0009414;GO:0006970;GO:0009409;GO:0009737;GO:0010286;GO:0050832;GO:0009631;	-	GO:0005829;	1e-14
Ds32264_c0_g1_i1	607	3.30107	2.32792e-07	3.07667	9.43926e-07	4.73005	3.3758e-06	DGK2_ARATH	Diacylglycerol kinase 2	GO:0048364;GO:0009611;GO:0009409;GO:0007205;GO:0048366;GO:0035556;GO:0006952;	GO:0046872;GO:0004143;GO:0005524;	GO:0005622;GO:0016021;	8e-44
Ds36327_c0_g1_i1	724	4.10134	3.50432e-08	3.55964	6.10365e-06	4.66789	3.38766e-05	DFRA_PETHY	Dihydroflavonol-4-reductase	GO:0009718;	GO:0045552;GO:0050662;	-	4e-05
Ds53453_c0_g1_i4	6350	1.17346	5.99679e-08	2.0792	2.57276e-21	1.23648	0.0329854	TAO1_ARATH	Disease resistance protein TAO1	GO:0007165;GO:0009816;GO:0042742;	GO:0005524;GO:0043531;	-	7e-113
Ds34981_c0_g1_i2	1334	3.2667	1.45967e-29	1.8009	4.56769e-09	5.13316	3.94795e-10	CMT2_ARATH	DNA (cytosine-5)-methyltransferase CMT2	GO:0006351;GO:0006355;GO:0010426;GO:0016568;GO:0034605;GO:0090116;	GO:0003677;GO:0003886;GO:0003682;	GO:0005634;	4e-19
Ds28597_c0_g1_i3	1784	1.61499	0.00339476	1.70774	0.00118125	3.7474	4.59447e-06	ATL31_ARATH	E3 ubiquitin-protein ligase ATL31	GO:0010200;GO:0009737;GO:0009814;GO:0009816;GO:0043562;	GO:0008270;GO:0004842;GO:0016874;	GO:0016020;GO:0016021;	1e-40
Ds78302_c0_g1_i4	1167	0.922122	0.00185533	1.16898	5.18501e-05	2.76831	0.000116344	ELIP2_ARATH	Early light-induced protein 2, chloroplastic	GO:0010224;GO:0010114;GO:0010218;GO:0010380;GO:0010030;GO:0015979;GO:0010117;GO:0071492;GO:0071491;GO:0071486;GO:0034605;GO:0071490;GO:0071483;	-	GO:0009523;GO:0009522;GO:0016021;GO:0009535;	9e-43
Ds33334_c0_g1_i2	3636	3.4208	1.8673e-47	1.05523	4.25157e-06	4.16474	2.47127e-08	ENL2_ARATH	Early nodulin-like protein 2	-	GO:0009055;	GO:0005773;GO:0005886;GO:0009507;GO:0048046;GO:0046658;GO:0031225;	8e-26
Ds57680_c0_g1_i3	1899	5.97929	9.96168e-05	7.31922	4.79413e-11	8.56398	0.0121555	LEAD8_DAUCA	Embryonic protein DC-8	-	-	GO:0005576;GO:0005737;GO:0005618;	2e-43
Ds31392_c0_g1_i2	1170	3.04095	5.48047e-11	2.25794	1.54072e-05	4.30555	4.32505e-07	ERF79_ARATH	Ethylene-responsive transcription factor 8	GO:0006351;GO:0009873;	GO:0003700;GO:0003677;	GO:0005634;	2e-22
Ds31392_c0_g1_i4	1170	3.06752	9.76429e-13	2.09253	1.8943e-05	2.99041	0.000277107	ERF79_ARATH	Ethylene-responsive transcription factor 8	GO:0006351;GO:0009873;	GO:0003700;GO:0003677;	GO:0005634;	2e-22
Ds26021_c0_g1_i2	3606	4.00224	1.48418e-57	1.16204	2.96928e-06	4.64524	1.89717e-09	SKI14_ARATH	F-box protein SKIP14	GO:0016567;	-	-	1e-57
Ds18458_c0_g1_i1	711	5.25749	0.00464266	5.78634	0.000187	6.87396	0.000334418	GOLS2_SOLLC	Galactinol synthase 2	GO:0006012;	GO:0046872;GO:0047216;	GO:0005737;	2e-77
Ds74246_c0_g1_i3	2685	4.01099	6.93568e-40	2.23489	1.52563e-11	4.29796	3.62789e-08	GOLS2_SOLLC	Galactinol synthase 2	GO:0006012;	GO:0046872;GO:0047216;	GO:0005737;	2e-153
Ds15714_c0_g1_i2	2431	3.26513	3.54029e-11	2.05888	0.000382556	2.28011	0.0101838	GDL14_ARATH	GDSL esterase/lipase At1g29660	GO:0009627;GO:0016042;	GO:0016788;	GO:0005634;GO:0048046;	5e-87
Ds62055_c0_g1_i1	2502	3.51707	2.88136e-25	2.40864	3.04251e-11	5.88132	6.62316e-12	GDL76_ARATH	GDSL esterase/lipase At5g14450	GO:0016042;	GO:0016788;	GO:0009506;GO:0009505;GO:0005576;	9e-60
Ds60909_c0_g1_i3	2570	1.26847	4.11283e-09	0.723437	0.000756609	1.83616	0.00359401	E13B_WHEAT	Glucan endo-1,3-beta-glucosidase	GO:0006952;GO:0005975;	GO:0042973;	-	6e-96
Ds46585_c0_g1_i5	4576	0.950024	0.000315989	0.867288	0.0009466	1.20844	0.0421834	DEG15_ARATH	Glyoxysomal processing protease, glyoxysomal	GO:0016485;	GO:0004252;GO:0004175;	GO:0005777;	9e-72
Ds8061_c0_g1_i5	3094	2.41824	3.28553e-10	2.4352	1.28719e-10	4.47352	2.46184e-08	Y5248_ARATH	G-type lectin S-receptor-like serine/threonine-protein kinase At5g24080	GO:0048544;	GO:0004674;GO:0030246;GO:0005516;GO:0005524;	GO:0005886;GO:0016021;	0
Ds52028_c0_g1_i2	1147	2.80172	0.000339552	2.92157	7.67958e-05	3.45317	0.00065709	HSF24_SOLPE	Heat shock factor protein HSF24	GO:0006351;	GO:0003700;GO:0043565;	GO:0005634;	5e-32
Ds52419_c0_g1_i1	1853	1.31846	0.00432459	1.8458	1.43295e-05	1.85437	0.0121555	HSF30_SOLPE	Heat shock factor protein HSF30	GO:0006351;	GO:0003700;GO:0043565;	GO:0005634;	3e-56
Ds34911_c0_g1_i1	1259	2.49609	1.82532e-21	1.8798	1.88357e-12	5.16773	2.3661e-10	HBPL1_ARATH	Heme-binding-like protein At3g10130, chloroplastic	-	-	GO:0010287;GO:0009535;GO:0009507;	2e-09
Ds57287_c0_g1_i1	2891	1.11141	0.00244589	1.35713	6.48184e-05	1.57961	0.0194543	ANL2_ARATH	Homeobox-leucine zipper protein ANTHOCYANINLESS 2	GO:0006351;GO:0048765;GO:0048364;GO:0009827;GO:0042335;GO:0043481;	GO:0003700;GO:0043565;GO:0008289;	GO:0005634;	0
Ds59933_c0_g2_i1	915	6.07097	5.32834e-05	5.68143	0.000352487	8.75944	6.17179e-05	ATB12_ARATH	Homeobox-leucine zipper protein ATHB-12	GO:0006351;GO:0009414;GO:0009615;GO:0006970;GO:0009737;GO:0045893;GO:0007275;	GO:0003700;GO:0043565;	GO:0005634;	2e-32
Ds47536_c0_g1_i2	1577	4.16467	7.31686e-24	3.00394	1.49193e-10	3.85572	3.49725e-06	ATHB7_ARATH	Homeobox-leucine zipper protein ATHB-7	GO:0006351;GO:0009414;GO:0009737;GO:0045893;	GO:0003700;GO:0043565;	GO:0005634;	4e-29
Ds70933_c0_g1_i1	1814	4.12622	2.02021e-47	3.59468	1.42934e-36	4.71949	3.03309e-09	ATHB7_ARATH	Homeobox-leucine zipper protein ATHB-7	GO:0006351;GO:0009414;GO:0009737;GO:0045893;	GO:0003700;GO:0043565;	GO:0005634;	3e-40
Ds58296_c0_g1_i3	1863	4.05678	1.95427e-39	2.3579	1.51835e-12	3.62749	1.74597e-06	HA22E_ARATH	HVA22-like protein e	GO:0009414;GO:0009409;GO:0009737;GO:0042538;	-	GO:0016021;	2e-38
Ds2902_c0_g1_i5	2295	4.42824	2.09886e-66	0.914475	0.000463131	3.95636	1.08636e-07	RCI2A_ARATH	Hydrophobic protein RCI2A	GO:0009409;GO:0009737;GO:0042538;	-	GO:0016021;	2e-18
Ds2513_c0_g1_i2	5036	2.24057	1.59608e-25	2.57538	1.96126e-32	1.23432	0.0335584	IMT1_MESCR	Inositol 4-methyltransferase	GO:0006020;	GO:0008171;GO:0030787;	-	2e-161
Ds2513_c0_g1_i7	5036	1.74779	1.15266e-16	2.08879	1.12439e-22	1.18986	0.0399963	IMT1_MESCR	Inositol 4-methyltransferase	GO:0006020;	GO:0008171;GO:0030787;	-	2e-161
Ds63233_c0_g1_i1	3023	2.14022	1.33491e-23	2.27368	3.32983e-26	2.33939	0.000332317	INO1_TOBAC	Inositol-3-phosphate synthase	GO:0008654;GO:0006021;	GO:0004512;	GO:0005737;	0
Ds78645_c0_g1_i3	3559	1.00593	7.32332e-05	0.897662	0.000335651	1.89559	0.00295546	LAC12_ARATH	Laccase-12	GO:0046274;	GO:0016722;GO:0052716;GO:0005507;	GO:0048046;	0
Ds39833_c0_g1_i3	977	5.33525	3.71413e-18	2.84826	0.00118753	4.81792	8.77138e-06	LEA1_CICAR	Late embryogenesis abundant protein 1	-	-	-	5e-23
Ds66796_c0_g1_i1	1138	3.03536	4.81704e-25	1.78727	1.01634e-08	2.1804	0.00232454	LEA47_ARATH	Late embryogenesis abundant protein 47	-	-	GO:0005634;GO:0005829;	2e-25
Ds69829_c0_g1_i3	2465	5.63011	8.81687e-103	1.39625	8.51623e-09	5.64968	6.41206e-12	LEA76_BRANA	Late embryogenesis abundant protein 76	-	-	-	3e-16
Ds49577_c0_g1_i1	1728	5.97487	2.71513e-77	3.66373	3.16519e-27	7.12359	4.42398e-15	LEA29_GOSHI	Late embryogenesis abundant protein D-29	-	-	-	9e-21
Ds19005_c0_g1_i3	977	4.59317	3.47469e-74	1.49005	6.49214e-10	4.31134	3.30558e-08	LEA14_GOSHI	Late embryogenesis abundant protein Lea14-A	GO:0009269;	-	-	1e-49
Ds8525_c0_g1_i1	612	2.41452	0.00639309	2.97549	4.67603e-05	3.13232	0.00725166	VAS_ARATH	Lipid transfer-like protein VAS	GO:0006810;	GO:0008289;	GO:0031225;	3e-20
Ds23929_c0_g1_i1	2285	0.849154	6.79014e-05	0.778811	0.000252377	1.5007	0.0152175	MAN7_ARATH	Mannan endo-1,4-beta-mannosidase 7	GO:0009845;GO:0046355;	GO:0016985;	GO:0005576;GO:0071944;	2e-158
Ds29506_c0_g1_i3	5471	2.27083	1.81759e-24	1.12182	2.87969e-07	2.53973	0.000112708	MPK19_ARATH	Mitogen-activated protein kinase 19	GO:0000165;	GO:0004707;GO:0005524;	GO:0005622;	0
Ds8716_c0_g1_i3	2185	1.1046	0.00017947	1.11428	0.000146626	1.56526	0.0165006	MPK19_ARATH	Mitogen-activated protein kinase 19	GO:0000165;	GO:0004707;GO:0005524;	GO:0005622;	1e-96
Ds4080_c0_g1_i1	1900	3.2458	6.31736e-12	1.87226	0.000877812	2.81714	0.000756935	ABHD6_MOUSE	Monoacylglycerol lipase ABHD6	-	-	-	1e-07
Ds42497_c0_g1_i1	953	1.38995	1.15169e-05	1.62661	1.31574e-07	2.55365	0.000504704	LTPG2_ARATH	Non-specific lipid transfer protein GPI-anchored 2	GO:0006869;GO:0042335;	GO:0008289;	GO:0005886;GO:0046658;GO:0031225;	4e-08
Ds33570_c0_g1_i5	4255	1.66498	6.04983e-15	0.71393	0.000709626	1.65334	0.00691918	SYFM_ARATH	Phenylalanine--tRNA ligase, chloroplastic/mitochondrial	GO:0008033;GO:0006432;	GO:0000049;GO:0004826;GO:0000287;GO:0005524;	GO:0005739;GO:0005759;GO:0016020;GO:0009570;GO:0009507;	6e-176
Ds194_c0_g1_i1	605	6.3886	2.47519e-06	5.5683	0.000667207	6.63299	2.65242e-09	PSBR_ARATH	Photosystem II 10 kDa polypeptide, chloroplastic	GO:0009735;GO:0010270;	-	GO:0009579;GO:0009654;GO:0009535;GO:0009534;GO:0009507;	7e-56
Ds70118_c0_g1_i5	5546	2.78918	1.52984e-32	1.03674	9.00009e-06	3.53797	6.81333e-07	PDR1_TOBAC	Pleiotropic drug resistance protein 1	GO:0006810;	GO:0016887;GO:0005524;	GO:0016021;	0
Ds27687_c0_g1_i1	3534	1.04297	0.000234322	1.1714	2.04495e-05	1.76109	0.00598626	SKOR_ARATH	Potassium channel SKOR	GO:0042391;GO:0006813;	GO:0015271;	GO:0016021;	0
Ds31952_c0_g1_i6	2668	2.09825	1.01347e-13	1.34922	4.64142e-06	2.35181	0.00050608	FBT7_ARATH	Probable folate-biopterin transporter 7	GO:0006810;	-	GO:0016021;	1e-133
Ds85881_c0_g1_i3	2951	0.810001	0.00121315	1.63736	1.41762e-11	3.16473	6.45767e-06	RFS5_ARATH	Probable galactinol--sucrose galactosyltransferase 5	GO:0009414;GO:0006979;GO:0009737;GO:0005975;	GO:0047274;	GO:0009507;	0
Ds63665_c0_g1_i2	1643	2.14888	0.000184687	1.87226	0.000877812	2.04321	0.0194543	GATL1_ARATH	Probable galacturonosyltransferase-like 1	GO:0010051;GO:0045489;GO:0032504;GO:0048366;GO:0010417;GO:0052386;	GO:0016757;GO:0047262;	GO:0016021;GO:0005794;GO:0005789;GO:0005783;	4e-133
Ds29635_c0_g2_i1	2310	3.5573	2.9567e-39	3.56283	1.07691e-39	3.66873	6.65059e-07	INT2_ARATH	Probable inositol transporter 2	GO:0023052;GO:0015992;GO:0015798;GO:0035428;GO:1904659;GO:0046323;	GO:0005351;GO:0005366;GO:0005355;	GO:0090406;GO:0005886;GO:0005887;	0
Ds50169_c0_g6_i2	896	1.68463	5.65816e-10	1.12619	4.26423e-05	3.26261	1.35463e-05	MTDH_FRAAN	Probable mannitol dehydrogenase	-	GO:0008270;GO:0046029;	-	4e-37
Ds75865_c0_g1_i1	1274	2.65141	1.05875e-14	1.63703	1.06852e-05	1.47999	0.0451262	MTDH_MESCR	Probable mannitol dehydrogenase	-	GO:0008270;GO:0046029;	-	4e-41
Ds82275_c0_g1_i2	1600	2.31063	2.79134e-24	1.28482	1.02776e-08	1.28815	0.0403363	MTDH_MESCR	Probable mannitol dehydrogenase	-	GO:0008270;GO:0046029;	-	2e-159
Ds43117_c0_g1_i2	843	2.61803	1.56748e-25	0.93783	0.000318368	2.18768	0.00234396	MD37E_ARATH	Probable mediator of RNA polymerase II transcription subunit 37e	GO:0006351;GO:0090332;GO:0009615;GO:0009408;GO:0009409;GO:0046686;GO:0006355;GO:0010187;GO:0098542;GO:0050832;GO:0042742;	GO:0002020;GO:0005524;	GO:0005774;GO:0009506;GO:0005886;GO:0005634;GO:0005730;GO:0016020;GO:0005794;GO:0022626;GO:0005829;GO:0005737;GO:0009507;GO:0005618;GO:0048046;	1e-57
Ds9644_c0_g1_i2	1803	4.94504	4.08541e-09	7.25139	8.66696e-36	6.224	2.41617e-07	NRX2_ORYSJ	Probable nucleoredoxin 2	-	GO:0047134;	-	4e-86
Ds39618_c0_g1_i2	1299	2.57239	8.2223e-05	2.88019	9.25093e-07	3.15407	0.000631523	PLY4_ARATH	Probable pectate lyase 4	GO:0045490;	GO:0030570;GO:0046872;	-	3e-42
Ds78028_c0_g1_i4	2525	1.74052	3.03051e-10	1.13698	6.93065e-05	1.24931	0.0476211	PLST2_ARATH	Probable plastidic glucose transporter 2	GO:0008643;	GO:0022891;	GO:0016021;GO:0031969;	5e-165
Ds41293_c0_g1_i2	1613	2.1903	3.32998e-20	1.47774	4.81976e-10	3.21286	6.73647e-06	PAP6_ARATH	Probable plastid-lipid-associated protein 6, chloroplastic	GO:0010193;GO:0042742;GO:0009658;	-	GO:0031977;GO:0009579;GO:0010287;GO:0005886;GO:0005634;GO:0016020;GO:0009535;GO:0009534;GO:0009941;GO:0009507;	5e-77
Ds8355_c0_g1_i5	2969	1.47946	0.000187747	1.37582	0.000486893	1.84044	0.00788408	SERIC_NEMVE	Probable serine incorporator	-	-	-	0.001
Ds32054_c0_g2_i1	3223	2.93582	4.11444e-24	1.33662	2.34009e-05	2.07392	0.00198564	WNK5_ARATH	Probable serine/threonine-protein kinase WNK5	GO:0006468;GO:0048573;	GO:0004674;GO:0004672;GO:0043424;GO:0005524;	-	2e-149
Ds11469_c0_g1_i3	2054	1.73304	3.20583e-12	1.1853	2.10667e-06	2.43775	0.000302342	DTX35_ARATH	Protein DETOXIFICATION 35	GO:0009813;	GO:0015238;GO:0015297;	GO:0005773;GO:0005774;GO:0016021;	0
Ds43059_c0_g1_i4	4030	1.48314	2.81532e-12	0.735267	0.000473603	1.44022	0.0164095	DTX40_ARATH	Protein DETOXIFICATION 40	-	GO:0015238;GO:0015297;	GO:0005773;GO:0005774;GO:0016021;	3e-157
Ds60320_c0_g1_i3	2203	2.88138	3.37581e-27	1.55269	1.73583e-08	1.3236	0.0377956	CER3_ARATH	Protein ECERIFERUM 3	GO:0010025;GO:0048235;GO:0006633;GO:0006723;GO:0042335;GO:0043447;	GO:0016491;GO:0005506;	GO:0005886;GO:0016020;GO:0016021;GO:0005789;	9e-163
Ds33261_c0_g1_i5	4973	1.4356	1.85175e-08	1.30088	3.59531e-07	2.31037	0.000431508	HTH_ARATH	Protein HOTHEAD	GO:0010430;GO:0009553;GO:0007267;	GO:0016614;GO:0046593;GO:0050660;	GO:0005576;	0
Ds9759_c0_g1_i2	1229	2.06895	4.27605e-05	1.72746	0.000878105	2.73419	0.00108222	LOR17_ARATH	Protein LURP-one-related 17	-	-	-	2e-41
Ds85010_c0_g1_i3	3718	2.50672	1.49034e-28	1.27813	8.77522e-09	3.18027	4.91611e-06	PTR33_ARATH	Protein NRT1/ PTR FAMILY 6.4	GO:0042128;	GO:0015293;	GO:0016021;	2e-78
Ds68318_c0_g1_i1	2121	2.48194	0.000672116	3.47026	3.6972e-09	2.19265	0.0421834	NFD4_ARATH	Protein NUCLEAR FUSION DEFECTIVE 4	GO:0006810;GO:0009651;GO:0010197;GO:0000741;	-	GO:0016021;	1e-37
Ds528_c0_g1_i5	3037	3.80811	4.26454e-53	0.835935	0.000886327	3.04011	1.27504e-05	SDS22_YEAST	Protein phosphatase 1 regulatory subunit SDS22	-	-	-	0.0002
Ds18525_c0_g1_i1	1895	2.28419	2.81732e-11	3.45679	4.59216e-28	3.39649	6.05474e-06	P2C16_ARATH	Protein phosphatase 2C 16	GO:0009738;	GO:0004722;GO:0046872;	GO:0005634;GO:0005737;	2e-38
Ds18525_c0_g1_i4	1895	2.37379	1.35876e-11	3.71046	3.65553e-31	2.9726	5.65263e-05	P2C16_ARATH	Protein phosphatase 2C 16	GO:0009738;	GO:0004722;GO:0046872;	GO:0005634;GO:0005737;	2e-38
Ds64658_c0_g1_i4	2261	2.25915	2.96328e-08	1.8458	1.43295e-05	2.35533	0.00139805	P2C16_ARATH	Protein phosphatase 2C 16	GO:0009738;	GO:0004722;GO:0046872;	GO:0005634;GO:0005737;	5e-20
Ds64658_c0_g1_i5	2261	2.35103	9.37918e-08	2.24822	5.50289e-07	2.70955	0.000400747	P2C16_ARATH	Protein phosphatase 2C 16	GO:0009738;	GO:0004722;GO:0046872;	GO:0005634;GO:0005737;	2e-20
Ds76274_c0_g2_i8	4868	1.31907	5.78214e-05	1.70547	5.96929e-08	2.64975	0.000128599	RBBP_ARATH	Protein RBL	GO:0010228;	-	GO:0048188;GO:0005634;	6e-125
Ds39257_c0_g1_i1	2643	1.0334	1.53539e-06	0.924221	1.67139e-05	2.08891	0.0011393	TOLB_PELCD	Protein TolB	-	-	-	3e-11
Ds25823_c0_g1_i4	886	4.58522	3.02271e-07	4.19175	8.426e-06	7.11839	3.41395e-09	PRG4_MOUSE	Proteoglycan 4	-	-	-	1e-05
Ds56685_c0_g1_i2	1794	1.70986	7.60095e-13	0.815594	0.000776688	1.41208	0.0254149	OPR11_ORYSJ	Putative 12-oxophytodienoate reductase 11	GO:0031408;GO:0055114;	GO:0003959;GO:0010181;	GO:0005622;	7e-86
Ds6400_c0_g2_i3	2905	1.94732	8.70873e-15	0.855814	0.00109098	2.17298	0.000928204	XB35_ARATH	Putative E3 ubiquitin-protein ligase XBAT35	-	GO:0008270;GO:0004842;GO:0016874;	GO:0005634;GO:0005737;	4e-62
Ds59686_c0_g2_i1	2862	2.74609	2.45475e-21	1.86939	4.10002e-10	3.59868	1.04182e-06	GLPT4_ARATH	Putative glycerol-3-phosphate transporter 4	GO:0055085;GO:0055062;GO:0008643;GO:0006820;	GO:0022857;	GO:0005774;GO:0016021;	0
Ds49898_c0_g3_i2	568	6.64876	2.27396e-07	6.14309	1.54285e-05	7.65844	2.59792e-09	YM173_YEAST	Putative uncharacterized membrane protein YMR173W-A	-	-	-	0.006
Ds21102_c0_g1_i2	2406	3.5417	1.73736e-20	1.60319	0.000764908	5.29105	5.25648e-10	PDC1_PEA	Pyruvate decarboxylase 1	-	GO:0030976;GO:0004737;GO:0000287;	-	0
Ds19989_c0_g1_i1	5764	2.71362	1.67142e-13	1.87283	2.16716e-06	4.42146	2.18089e-08	POL3_DROME	Retrovirus-related Pol polyprotein from transposon 17.6	-	-	-	1e-44
Ds78429_c0_g1_i1	674	4.82039	2.01468e-08	4.13101	1.47851e-05	7.45679	9.27818e-10	RBM12_MOUSE	RNA-binding protein 12	-	-	-	0.0006
Ds16028_c0_g1_i3	3058	2.13477	4.97819e-17	2.53133	8.24312e-24	3.08056	1.11457e-05	DCAM1_DIACA	S-adenosylmethionine decarboxylase proenzyme 1	GO:0006597;GO:0008295;GO:0006557;	GO:0004014;	-	2e-75
Ds80299_c0_g1_i1	874	2.3416	5.31672e-19	2.49619	1.39751e-21	3.48449	4.21109e-06	DCAM1_DIACA	S-adenosylmethionine decarboxylase proenzyme 1	GO:0006597;GO:0008295;GO:0006557;	GO:0004014;	-	1e-116
Ds49238_c0_g1_i1	1231	2.41758	6.09387e-07	1.72746	0.000878105	3.5961	1.93457e-05	METK2_DIACA	S-adenosylmethionine synthase 2	GO:0006556;GO:0006730;	GO:0004478;GO:0046872;GO:0005524;	GO:0005737;	1e-12
Ds27370_c0_g1_i1	464	2.01959	4.33535e-10	2.16258	1.08468e-11	3.09781	0.000516559	SCGT_TOBAC	Scopoletin glucosyltransferase	-	GO:0050275;GO:0042802;	-	2e-44
Ds65534_c0_g1_i4	1869	1.47376	8.25337e-10	1.28335	8.47734e-08	2.5031	0.000214141	SCGT_TOBAC	Scopoletin glucosyltransferase	-	GO:0050275;GO:0042802;	-	5e-150
Ds70798_c0_g1_i1	508	1.48804	0.000140823	1.42095	0.000221149	2.31916	0.0126649	SCGT_TOBAC	Scopoletin glucosyltransferase	-	GO:0050275;GO:0042802;	-	1e-32
Ds36902_c0_g1_i1	2123	1.53095	8.34855e-05	1.40085	0.000283508	3.20878	1.81478e-05	CDL1_ARATH	Serine/threonine-protein kinase CDL1	GO:1900459;GO:0009742;	GO:0004674;GO:0005524;	GO:0005886;	3e-147
Ds23091_c0_g2_i5	1729	3.31136	3.93054e-06	2.74654	0.000339552	2.44931	0.0247372	SPZX_ARATH	Serpin-ZX	GO:0010951;	GO:0004867;GO:0004869;	GO:0005615;GO:0048046;	5e-92
Ds54456_c0_g1_i3	2181	2.55306	6.0242e-26	0.813053	0.00108087	3.49157	1.25758e-06	SPZX_ARATH	Serpin-ZX	GO:0010951;	GO:0004867;GO:0004869;	GO:0005615;GO:0048046;	2e-129
Ds45121_c0_g1_i3	1478	3.40625	2.73198e-19	2.06658	1.91127e-06	2.92817	0.000164218	HSPC2_RICFE	Small heat shock protein C2	-	-	-	7e-09
Ds24476_c0_g1_i2	2001	2.80655	3.44157e-34	0.857875	0.000144356	1.34018	0.030545	SGT2_SOYBN	Soyasapogenol B glucuronide galactosyltransferase	GO:0052696;GO:0009813;	GO:0080044;GO:0080043;	GO:0043231;	4e-111
Ds55578_c0_g1_i8	10191	2.10416	7.69635e-23	0.753757	0.000282452	1.20864	0.0346424	SF3B3_MOUSE	Splicing factor 3B subunit 3	-	-	-	0
Ds45944_c0_g1_i2	1557	1.60965	0.000294925	1.82386	1.93841e-05	2.58353	0.000590963	STEP2_ARATH	Stress enhanced protein 2, chloroplastic	GO:0009611;GO:0009765;GO:0071492;GO:0071486;	GO:0016168;	GO:0009523;GO:0016021;GO:0009535;	4e-42
Ds55519_c0_g1_i2	5040	1.76841	4.48228e-15	2.15868	1.41611e-21	1.93193	0.00212367	SUSY_BETVU	Sucrose synthase (Fragment)	GO:0005985;	GO:0016157;	-	0
Ds78486_c0_g1_i2	2290	1.69306	3.61438e-05	2.41307	9.47261e-11	2.3152	0.00140992	SUT_SPIOL	Sucrose transport protein	GO:0005985;	GO:0015293;GO:0008515;	GO:0005887;	0
Ds82324_c0_g1_i1	3892	2.60201	1.01548e-30	0.747441	0.000707316	3.24551	3.35361e-06	SPSA_SPIOL	Sucrose-phosphate synthase	GO:0005986;	GO:0046524;GO:0016157;	-	0
Ds23331_c0_g1_i2	3013	2.58735	9.05728e-25	1.14725	9.94253e-06	1.69484	0.00774339	SYT4_ARATH	Synaptotagmin-4	-	GO:0046872;GO:0008289;	GO:0016021;GO:0005783;	3e-120
Ds13702_c0_g1_i1	2268	2.30469	1.68897e-26	1.40759	2.75865e-11	2.11046	0.00108291	TIL_ARATH	Temperature-induced lipocalin-1	GO:0010431;GO:0009414;GO:1901562;GO:0009416;GO:0009644;GO:0009408;GO:0050826;GO:0009735;GO:0009409;GO:1901002;GO:1902884;GO:0006629;GO:0042538;GO:0010286;GO:0006883;GO:0030644;	GO:0005215;GO:0045735;	GO:0005773;GO:0005774;GO:0009506;GO:0005886;GO:0005739;GO:0005794;GO:0005783;GO:0009898;GO:0005737;GO:0031969;GO:0009941;	1e-73
Ds81529_c0_g1_i2	1793	2.99874	1.9177e-08	1.91805	0.00128011	4.35337	5.86285e-07	MYB39_ARATH	Transcription factor MYB39	GO:0006355;	GO:0003700;GO:0003677;	GO:0005634;	9e-64
Ds57128_c0_g1_i2	2789	1.61636	1.11632e-11	0.801335	0.000835859	1.70705	0.00681944	TAF1_ARATH	Transcription initiation factor TFIID subunit 1	GO:0006351;GO:0006355;GO:0009294;GO:0016568;	-	GO:0005634;	6e-58
Ds49197_c0_g1_i1	2957	1.39164	0.00158739	2.03418	2.58387e-07	2.52693	0.000552591	YI31B_YEAST	Transposon Ty3-I Gag-Pol polyprotein	-	-	-	6e-122
Ds49197_c0_g1_i2	2957	2.5519	5.98948e-08	2.55303	1.05419e-07	3.36828	3.36529e-05	YI31B_YEAST	Transposon Ty3-I Gag-Pol polyprotein	-	-	-	6e-122
Ds29371_c0_g1_i2	1182	3.48212	4.69644e-39	1.13168	7.10859e-05	2.2228	0.00152424	RHM1_ARATH	Trifunctional UDP-glucose 4,6-dehydratase/UDP-4-keto-6-deoxy-D-glucose 3,5-epimerase/UDP-4-keto-L-rhamnose-reductase RHM1	GO:0010253;GO:0042127;GO:0051555;GO:0071555;GO:0030154;GO:0010315;	GO:0010280;GO:0050377;GO:0016491;GO:0016853;GO:0008460;	GO:0009506;GO:0005829;	0
Ds28165_c0_g1_i1	1603	0.980627	0.00131285	1.10431	0.000215857	1.38904	0.0356486	TRN1_COCOF	Tropinone reductase	-	GO:0050358;GO:0050356;	-	1e-72
Ds45283_c0_g1_i4	2236	2.72656	4.26218e-17	1.51274	2.29327e-05	3.27076	9.85883e-06	U74G1_STERE	UDP-glycosyltransferase 74G1	-	GO:0016758;	-	2e-41
Ds55165_c0_g1_i1	875	3.88716	4.53154e-07	3.07948	0.00041343	4.69045	2.03815e-05	U74G1_STERE	UDP-glycosyltransferase 74G1	-	GO:0016758;	-	0.006
Ds80844_c0_g1_i2	1625	2.23078	8.39027e-05	1.91631	0.00059626	3.62916	1.82968e-05	U90A1_ARATH	UDP-glycosyltransferase 90A1	-	GO:0016758;	-	6e-60
Ds6279_c0_g1_i2	1870	2.45792	7.46299e-09	2.43364	8.98924e-09	2.77415	0.000349249	Y3G1_ENCCU	Uncharacterized protein ECU03_1610	-	-	-	2e-09
Ds37590_c0_g2_i1	2789	1.12178	7.9247e-07	0.945042	3.09043e-05	1.65575	0.00792395	YCF45_PORPU	Uncharacterized protein ycf45	-	GO:0003676;GO:0005524;	GO:0009507;	7e-122
Ds11763_c0_g1_i1	3890	3.23729	4.48976e-46	1.0595	8.18602e-07	2.60053	8.76117e-05	Y1515_ARATH	Uncharacterized TPR repeat-containing protein At1g05150	-	GO:0008270;GO:0016757;GO:0005509;	GO:0005802;GO:0009506;GO:0005886;GO:0005794;GO:0005768;	0
Ds56928_c0_g1_i3	2538	2.70944	1.49571e-26	1.05723	6.2615e-05	2.67158	9.12459e-05	Y2124_NOSS1	Uncharacterized WD repeat-containing protein all2124	-	-	-	9e-18
Ds68984_c0_g1_i2	1279	4.6968	2.46104e-30	2.0409	0.000184687	5.38501	1.72975e-09	USPAL_ARATH	Universal stress protein A-like protein	GO:0006950;	GO:0016208;	GO:0005886;	3e-11
Ds23041_c0_g1_i2	1249	5.67794	2.2634e-73	2.34519	6.7161e-11	4.9747	1.89717e-09	Y273_METTH	UPF0098 protein MTH_273	-	-	-	8e-21
Ds7488_c0_g2_i2	1254	3.78709	0.000447975	5.18404	2.34568e-11	6.76717	1.01977e-08	U496D_ORYSJ	UPF0496 protein 4	-	-	GO:0016021;	6e-05
Ds1188_c0_g1_i1	419	5.66307	0.000667207	6.14309	1.54285e-05	7.68574	1.51396e-08	-	-	-	-	-	-
Ds11986_c0_g1_i3	1331	5.80434	1.09516e-31	2.92157	7.67958e-05	4.19039	4.46382e-05	-	-	-	-	-	-
Ds14255_c0_g1_i2	1190	3.65693	3.82565e-47	1.28032	6.71954e-07	4.76081	2.14055e-09	-	-	-	-	-	-
Ds16823_c0_g1_i2	1474	3.63888	3.96543e-11	2.22828	0.000758987	3.93208	1.35463e-05	-	-	-	-	-	-
Ds18409_c0_g1_i1	1682	1.21953	1.91896e-06	1.01075	9.13601e-05	2.07672	0.00181343	-	-	-	-	-	-
Ds23498_c0_g1_i2	1111	1.3641	4.64286e-06	2.4992	1.80907e-19	2.76949	0.000122802	-	-	-	-	-	-
Ds26728_c0_g1_i1	1085	2.57131	6.63603e-13	2.13655	5.02309e-09	2.66669	0.000433798	-	-	-	-	-	-
Ds29711_c0_g1_i2	687	4.52715	2.13018e-14	5.69276	2.98179e-29	4.26099	8.14741e-05	-	-	-	-	-	-
Ds31881_c0_g1_i2	1377	2.65613	1.37065e-09	2.25006	1.31272e-06	3.63364	7.68371e-06	-	-	-	-	-	-
Ds33453_c0_g2_i1	1147	1.31871	0.00123242	2.95186	5.62123e-18	2.2243	0.00299246	-	-	-	-	-	-
Ds33500_c0_g1_i1	1770	1.79085	4.0581e-06	1.57944	4.93146e-05	1.69536	0.018536	-	-	-	-	-	-
Ds35831_c0_g1_i1	2519	4.39246	2.47729e-36	2.71812	3.45679e-12	4.53498	2.26823e-08	-	-	-	-	-	-
Ds41792_c0_g1_i5	1553	5.58828	2.76104e-66	2.71701	1.86519e-13	5.85082	1.44924e-11	-	-	-	-	-	-
Ds41837_c0_g2_i1	1405	3.12249	6.71824e-11	3.87477	2.21942e-18	5.24109	3.31129e-09	-	-	-	-	-	-
Ds53675_c0_g1_i1	1946	2.10271	3.24674e-06	3.57967	2.16971e-20	2.12433	0.00575829	-	-	-	-	-	-
Ds56150_c0_g1_i1	2114	3.11152	4.41898e-30	1.05053	0.000374403	1.38419	0.0319097	-	-	-	-	-	-
Ds57459_c0_g1_i1	1141	2.27005	5.64529e-05	2.26183	1.71074e-05	2.0957	0.0206193	-	-	-	-	-	-
Ds60167_c0_g2_i4	801	2.8517	0.00339444	3.14899	0.000243751	4.51355	5.12262e-05	-	-	-	-	-	-
Ds65709_c0_g1_i1	599	2.48538	2.8795e-16	1.10675	0.00111828	3.90871	1.84428e-06	-	-	-	-	-	-
Ds70678_c0_g1_i2	656	2.10436	2.91206e-05	1.87843	0.000430003	2.83086	0.00209326	-	-	-	-	-	-
Ds7604_c0_g1_i3	2620	5.30575	8.578e-56	1.47467	0.001266	3.40078	1.00496e-05	-	-	-	-	-	-
Ds7624_c0_g1_i1	960	6.29117	2.69333e-121	4.47243	1.33357e-70	6.22514	5.07552e-13	-	-	-	-	-	-
Ds79772_c0_g1_i3	2220	4.86237	8.95001e-64	1.2746	0.00011908	4.72286	2.51321e-09	-	-	-	-	-	-
Ds86798_c0_g2_i1	1889	1.98991	0.00285251	2.51937	1.14745e-05	2.10852	0.0194543	-	-	-	-	-	-

## Sheet: Table S2
Table S2. Down-regulated DEGs in cold-, drought- or combined cold and drought-treated samples
Transcript_id	Length(bp)	log2(CT/CK)	FDR	log2(DT/CK)	FDR	log2(CTDT/CK)	FDR	Gene_primary_name	Gene_description	Gene_ontology(biological process)	Gene_ontology(molecular function)	Gene_ontology(cellular compoment)	Blast_evalue
Ds20389_c0_g1_i5	2106	-3.54212	1.96374e-30	-0.780525	0.00103947	-3.36084	0.0223202	TPSGD_VITVI	(-)-germacrene D synthase	GO:0016114;	GO:0000287;GO:0052577;GO:0034004;	GO:0005737;	3e-102
Ds30454_c0_g1_i2	1478	-6.54794	3.52914e-25	-1.75848	6.01529e-08	-4.85022	0.00020588	ACCO5_ARATH	1-aminocyclopropane-1-carboxylate oxidase 5	GO:0009693;GO:0006952;	GO:0046872;GO:0031418;GO:0009815;	-	9e-115
Ds36208_c0_g1_i2	1935	-3.17435	2.55309e-26	-1.54525	7.76907e-10	-4.47978	0.000197849	ACCH1_ARATH	1-aminocyclopropane-1-carboxylate oxidase homolog 1	-	GO:0016491;GO:0046872;	-	4e-59
Ds40178_c0_g1_i3	2567	-2.2724	9.2963e-07	-1.66925	3.67393e-05	-3.54278	3.14394e-06	1A19_ARATH	1-aminocyclopropane-1-carboxylate synthase 9	GO:0006417;GO:0009835;GO:0009693;GO:0071281;GO:0042218;	GO:0030170;GO:0016847;	-	8e-176
Ds45819_c0_g1_i1	436	-3.03966	2.05278e-14	-1.77005	4.82151e-08	-2.95495	0.0108707	RRP3_SPIOL	30S ribosomal protein 3, chloroplastic	GO:0006412;	GO:0003735;GO:0019843;	GO:0005840;GO:0009507;	6e-34
Ds68139_c0_g2_i1	1899	-2.12767	5.70589e-14	-1.45973	2.22181e-08	-3.49825	0.0137446	RR21_SPIOL	30S ribosomal protein S21, chloroplastic (Fragment)	GO:0006412;	GO:0003735;GO:0019843;	GO:0005840;GO:0009507;	4e-06
Ds63991_c0_g1_i3	936	-1.69752	5.47356e-07	-1.43729	5.33314e-06	-5.03589	4.56875e-05	RR6_ARATH	30S ribosomal protein S6 alpha, chloroplastic	GO:0006412;	GO:0003735;GO:0019843;	GO:0009579;GO:0005840;GO:0009535;GO:0009507;	2e-31
Ds14012_c0_g2_i1	623	-1.53233	2.95064e-12	-1.97141	1.06284e-18	-11.0339	2.7714e-17	PRF1_SOLLC	36.4 kDa proline-rich protein	-	-	-	7e-12
Ds18804_c0_g1_i1	448	-1.39118	6.92915e-05	-1.41982	4.3055e-05	-3.69199	0.00135548	RS23_FRAAN	40S ribosomal protein S23	GO:0006412;	GO:0003735;	GO:0015935;	7e-22
Ds16741_c0_g1_i3	1272	-1.34058	2.89685e-05	-0.972043	0.00136175	-4.37573	0.000664059	RS30_ARATH	40S ribosomal protein S30	GO:0006412;	GO:0003735;	GO:0005730;GO:0022627;	3e-12
Ds56501_c0_g1_i2	878	-1.6112	6.19715e-13	-0.816092	0.000158245	-4.40355	8.76117e-05	PSRP5_SPIOL	50S ribosomal protein 5 alpha, chloroplastic	-	GO:0019843;	GO:0005840;GO:0009507;	9e-12
Ds7735_c0_g1_i1	1206	-1.32376	1.06385e-05	-1.79357	6.27395e-09	-4.03165	0.00212099	RK18_ARATH	50S ribosomal protein L18, chloroplastic	GO:0006412;	GO:0003735;GO:0008097;	GO:0005840;GO:0009570;GO:0009941;GO:0009507;	6e-24
Ds76447_c0_g1_i1	1002	-2.03664	3.5506e-12	-1.24702	2.986e-06	-3.65824	1.48158e-10	RK23_SPIOL	50S ribosomal protein L23, chloroplastic	GO:0006412;	GO:0003735;GO:0019843;GO:0000166;	GO:0005840;GO:0009507;	1e-09
Ds3884_c0_g1_i1	917	-1.62635	6.75098e-06	-1.07681	0.00105436	-4.63883	0.00028908	RK5_SPIOL	50S ribosomal protein L5, chloroplastic	GO:0006412;	GO:0003735;GO:0019843;	GO:0005840;GO:0009507;	2e-42
Ds41806_c0_g1_i2	871	-1.40751	5.04978e-09	-0.956734	3.6541e-05	-1.56429	1.35926e-13	RK6_ARATH	50S ribosomal protein L6, chloroplastic	GO:0006412;GO:0009735;	GO:0003735;GO:0019843;GO:0003723;	GO:0005840;GO:0016020;GO:0009570;GO:0009941;GO:0009507;	3e-29
Ds8598_c0_g1_i2	1240	-1.86651	1.0792e-10	-1.14053	1.83157e-05	-5.05604	1.80878e-05	RK9_IPOTF	50S ribosomal protein L9, chloroplastic	GO:0006412;	GO:0003735;GO:0019843;	GO:0005840;GO:0009507;	2e-31
Ds39594_c0_g1_i1	316	-1.63176	7.78994e-12	-1.26383	4.3062e-08	-5.27259	3.53331e-09	R10A_ORYSJ	60S ribosomal protein L10a	GO:0006412;	GO:0003735;GO:0003723;	GO:0015934;	3e-29
Ds9527_c0_g1_i2	997	-1.35209	2.53979e-09	-0.738593	0.000781185	-3.25408	0.0168488	RL371_ARATH	60S ribosomal protein L37-1	GO:0006412;	GO:0003735;GO:0019843;GO:0046872;	GO:0022625;	2e-44
Ds16565_c0_g1_i3	1150	-4.06963	1.27489e-08	-1.69819	0.000429203	-4.54689	0.00361999	RL4_PRUAR	60S ribosomal protein L4	GO:0006412;	GO:0003735;	GO:0005840;	6e-18
Ds160_c0_g1_i1	766	-4.30545	2.75402e-06	-3.10605	2.84737e-05	-4.11151	0.0357611	INVA_VICFA	Acid beta-fructofuranosidase	GO:0005985;	GO:0004575;	GO:0005773;	3e-36
Ds45073_c0_g1_i2	1121	-1.42293	0.000167219	-1.56124	3.78276e-05	-3.8727	0.00770058	PPA1_SOLLC	Acid phosphatase 1	-	GO:0003993;	-	1e-47
Ds28090_c0_g1_i3	935	-4.55691	1.75007e-07	-2.97151	9.86585e-06	-3.63485	0.0497487	AMYA_VIGMU	Alpha-amylase	GO:0005975;	GO:0005509;GO:0004556;	-	1e-69
Ds57246_c0_g1_i2	2476	-3.42602	3.35548e-10	-3.14945	1.11003e-09	-4.07936	0.00774339	ALMTA_ARATH	Aluminum-activated malate transporter 10	GO:0015743;	-	GO:0016021;	1e-111
Ds24851_c0_g1_i2	1730	-3.13541	1.69045e-12	-1.4655	2.24383e-05	-4.22411	0.00250503	NEP1_NEPGR	Aspartic proteinase nepenthesin-1	-	GO:0004190;	GO:0005576;	1e-33
Ds97_c0_g1_i2	792	-1.47555	0.000854382	-1.51729	0.000275399	-3.72463	0.014039	HIS1B_ARATH	ATP phosphoribosyltransferase 2, chloroplastic	GO:0000105;	GO:0000287;GO:0003879;	GO:0009570;GO:0009507;	5e-36
Ds81512_c0_g1_i1	1015	-2.61573	3.86548e-13	-1.30476	1.76804e-05	-3.18015	0.037298	LAX3_MEDTR	Auxin transporter-like protein 3	GO:0016126;GO:0048767;GO:0048829;GO:0010583;GO:0000271;GO:0009825;GO:0010311;GO:0071555;GO:0009932;GO:0016132;GO:0009734;GO:0009926;GO:0043481;GO:0006865;GO:0006084;	GO:0015293;GO:0010328;	GO:0005886;GO:0016021;	2e-53
Ds14113_c0_g1_i1	1105	-2.68911	6.47698e-05	-2.10672	0.00057344	-4.09424	0.0207162	IAA4_ARATH	Auxin-responsive protein IAA4	GO:0006351;GO:0009733;GO:0009734;	GO:0044212;GO:0003700;GO:0003677;	GO:0005634;	1e-18
Ds54465_c0_g2_i1	598	-1.68056	2.04768e-06	-1.87297	1.49768e-07	-3.15195	0.0247372	SAU21_ARATH	Auxin-responsive protein SAUR21	GO:0040008;GO:0007275;GO:0009734;	-	GO:0005886;	1e-21
Ds75513_c0_g1_i3	1061	-1.81152	1.9844e-06	-1.21213	0.000330333	-3.58496	0.0163172	SAU21_ARATH	Auxin-responsive protein SAUR21	GO:0040008;GO:0007275;GO:0009734;	-	GO:0005886;	2e-21
Ds33461_c0_g1_i2	1057	-3.50704	1.03095e-05	-3.68888	3.61809e-06	-5.64386	0.000895401	SAU23_ARATH	Auxin-responsive protein SAUR23	GO:0040008;GO:0007275;GO:0009734;	-	GO:0005886;	2e-19
Ds12093_c0_g1_i1	1512	-4.64639	5.909e-08	-3.06103	3.85312e-06	-5.73925	0.000245525	7SBG2_SOYBN	Basic 7S globulin 2	GO:0006508;GO:0030163;	GO:0045735;GO:0004190;	-	4e-19
Ds82106_c0_g1_i6	1686	-8.18606	3.67317e-18	-1.67118	1.30526e-05	-3.52037	0.026679	INVB_DAUCA	Beta-fructofuranosidase, soluble isoenzyme I	GO:0005975;	GO:0004575;	GO:0005773;	7e-114
Ds61283_c0_g1_i1	3094	-4.30076	4.80347e-63	-1.77126	4.38071e-16	-3.42097	0.0159444	XYL1_MEDSV	Beta-xylosidase/alpha-L-arabinofuranosidase 1 (Fragment)	GO:0045493;	GO:0009044;GO:0046556;	GO:0005578;	0
Ds5980_c0_g1_i1	829	-6.2197	8.35118e-06	-3.1873	0.00041343	-5.64024	0.00630988	CML3_ARATH	Calmodulin-like protein 3	-	GO:0005509;	GO:0005777;	2e-62
Ds72205_c0_g1_i3	2422	-2.90815	4.27624e-11	-1.93344	1.72431e-07	-4.00265	0.00759745	CCD7_ORYSJ	Carotenoid cleavage dioxygenase 7, chloroplastic	GO:1901601;GO:0010223;GO:0009733;GO:0016121;	GO:0016702;GO:0046872;GO:0045549;	GO:0009507;	1e-159
Ds18040_c0_g2_i1	1125	-1.56816	5.7521e-06	-3.15655	2.84233e-14	-8.19869	8.33191e-08	CIPK6_ARATH	CBL-interacting serine/threonine-protein kinase 6	GO:0007165;GO:0009414;GO:0009651;GO:0007275;GO:0042538;GO:0010540;	GO:0004674;GO:0005524;	GO:0005783;	5e-21
Ds13811_c0_g1_i1	986	-1.68058	0.000216832	-1.32726	0.00131234	-4.42053	0.00355017	CVIF2_ARATH	Cell wall / vacuolar inhibitor of fructosidase 2	GO:0080167;GO:0043086;	GO:0004857;	GO:0005773;	3e-34
Ds66750_c0_g1_i1	609	-6.72091	1.26331e-07	-2.00451	0.00128011	-6.04775	0.000754875	PYRG_VIBVY	CTP synthase	-	-	-	1e-14
Ds85073_c0_g2_i2	1873	-2.58696	0.000165623	-2.46954	0.000200837	-3.5643	0.000895401	C78A3_SOYBN	Cytochrome P450 78A3	GO:0044550;	GO:0016709;GO:0005506;GO:0020037;	GO:0016020;	2e-168
Ds31142_c0_g1_i2	1901	-3.99611	3.50432e-08	-2.7077	4.8473e-06	-4.90689	0.00459208	C94A1_VICSA	Cytochrome P450 94A1	-	GO:0016705;GO:0004497;GO:0005506;GO:0020037;	GO:0016021;GO:0005789;	1e-155
Ds61454_c0_g1_i2	1758	-3.17149	1.44857e-28	-0.988736	2.86271e-05	-6.0048	2.32566e-07	RGA2_SOLBU	Disease resistance protein RGA2	GO:0006952;	GO:0005524;GO:0043531;	-	0.0005
Ds6522_c0_g1_i2	1660	-3.08553	3.67457e-21	-1.09474	2.97159e-05	-5.63399	1.74597e-06	DR100_ARATH	DNA-damage-repair/toleration protein DRT100	GO:0006281;	GO:0000166;	GO:0009507;	2e-09
Ds54509_c0_g1_i2	1060	-2.32519	2.45584e-13	-1.30137	3.00093e-06	-4.48466	0.000247129	DOF35_ARATH	Dof zinc finger protein DOF3.5	GO:0006351;GO:0006355;	GO:0003700;GO:0046872;GO:0003677;	GO:0005634;	9e-28
Ds31052_c0_g1_i2	3666	-3.59144	3.72642e-15	-2.99388	8.89311e-14	-3.6456	0.0187573	MIEL1_ARATH	E3 ubiquitin-protein ligase MIEL1	GO:0016567;GO:1901485;GO:1900425;GO:0006952;	GO:0008270;GO:0004842;GO:0008134;GO:0016874;	GO:0005634;GO:0005737;	7e-33
Ds29434_c0_g1_i2	1722	-1.67006	7.19691e-09	-0.877456	0.000896038	-4.56529	0.000216673	RAP24_ARATH	Ethylene-responsive transcription factor RAP2-4	GO:0006351;GO:0009611;GO:0009414;GO:0009651;GO:0006970;GO:0009416;GO:0009409;GO:0045595;GO:0009873;GO:0009736;GO:0071472;	GO:0003700;GO:0043565;GO:0003677;	GO:0005634;	2e-38
Ds43943_c0_g1_i1	865	-2.31538	4.16753e-21	-0.744365	0.00082764	-4.7672	1.92712e-05	EXPA6_ARATH	Expansin-A6	GO:0006949;GO:0009664;	-	GO:0009505;GO:0016020;GO:0005576;	5e-82
Ds16374_c0_g1_i7	2670	-2.51231	3.09488e-28	-1.15303	6.25683e-08	-4.22439	0.000474744	EXPA8_ARATH	Expansin-A8	GO:0006949;GO:0009664;	-	GO:0016020;GO:0005576;GO:0005618;	5e-65
Ds3059_c0_g1_i1	1535	-1.83086	1.06965e-12	-2.18171	5.8848e-17	-3.12023	0.0433586	EXLA2_ARATH	Expansin-like A2	GO:0019953;	-	GO:0009506;GO:0009505;GO:0016020;GO:0005576;	1e-41
Ds61118_c0_g1_i2	1314	-2.08168	5.77312e-18	-1.19724	1.26942e-07	-3.95561	0.00127143	GASA6_ARATH	Gibberellin-regulated protein 6	GO:0009744;GO:0080167;GO:0009749;GO:0009750;GO:0009740;	-	GO:0005576;	2e-30
Ds33839_c0_g1_i1	1181	-7.54499	1.17118e-12	-4.51334	9.12761e-11	-3.99118	0.0172434	GPT1_ARATH	Glucose-6-phosphate/phosphate translocator 1, chloroplastic	GO:0007033;GO:0035436;GO:0009624;GO:0010152;GO:0015713;GO:0015714;GO:0034389;GO:0015760;GO:0009553;GO:0009793;	GO:0071917;GO:0015120;GO:0005315;GO:0015152;	GO:0009536;GO:0016021;GO:0031969;	1e-137
Ds41278_c0_g2_i2	578	-5.88382	9.96168e-05	-3.69482	0.000794618	-5.10434	0.0194543	GRC11_ARATH	Glutaredoxin-C11	GO:0045454;	GO:0015035;GO:0009055;	GO:0005737;	3e-34
Ds53557_c0_g2_i1	413	-6.72091	1.26331e-07	-3.68888	3.61809e-06	-7.56286	0.000895401	GRC11_ARATH	Glutaredoxin-C11	GO:0045454;	GO:0015035;GO:0009055;	GO:0005737;	7e-20
Ds67059_c0_g1_i3	2568	-4.92402	1.07003e-19	-2.27429	6.5306e-10	-6.41423	5.91605e-06	LAC17_ARATH	Laccase-17	GO:0009698;GO:0046274;GO:0009809;	GO:0016722;GO:0016491;GO:0052716;GO:0005507;	GO:0048046;	0
Ds18072_c0_g1_i1	874	-2.66892	3.42974e-07	-1.4508	0.000899245	-3.28054	0.048009	VAS_ARATH	Lipid transfer-like protein VAS	GO:0006810;	GO:0008289;	GO:0031225;	0.0002
Ds36679_c0_g1_i1	862	-1.7086	1.63682e-05	-1.65187	1.70498e-05	-3.28248	0.0362443	LHTL7_ARATH	Lysine histidine transporter-like 7	GO:0003333;	GO:0015171;	GO:0005886;GO:0016021;	1e-06
Ds31890_c0_g1_i4	1667	-2.37939	2.39929e-08	-1.39299	0.000147678	-3.40839	0.0339297	COR2_PAPSO	Non-functional NADPH-dependent codeinone reductase 2	-	GO:0016491;	GO:0005829;	1e-72
Ds15695_c0_g1_i1	788	-2.96861	2.81996e-08	-2.59278	1.40873e-07	-4.5435	0.00176447	PR1_MEDTR	Pathogenesis-related protein PR-1	GO:0048765;GO:0009607;GO:0006952;	-	GO:0005576;	7e-37
Ds54430_c0_g1_i1	835	-6.87155	2.21221e-08	-2.15523	0.000382556	-6.2854	0.000463122	PR1_MEDTR	Pathogenesis-related protein PR-1	GO:0048765;GO:0009607;GO:0006952;	-	GO:0005576;	3e-40
Ds48484_c0_g1_i1	921	-1.96898	1.3458e-08	-1.22023	9.27462e-05	-3.50539	0.0121555	ERLL1_ARATH	pEARLI1-like lipid transfer protein 1	GO:0009627;GO:0009626;GO:0009682;GO:0050832;GO:0009631;GO:0070417;	GO:0043621;	GO:0009506;GO:0005783;GO:0009707;GO:0005618;GO:0048046;	6e-19
Ds67045_c0_g1_i1	2352	-3.32367	1.59359e-12	-1.19318	0.000385752	-4.1964	0.00302675	PPR90_ARATH	Pentatricopeptide repeat-containing protein At1g62590	GO:0006171;	GO:0004016;	-	6e-26
Ds60729_c0_g1_i3	2039	-2.30771	1.33668e-11	-1.09366	0.000161883	-3.6466	0.0126139	PP358_ARATH	Pentatricopeptide repeat-containing protein At4g39620, chloroplastic	GO:0009793;	-	GO:0009507;	1e-167
Ds86334_c0_g1_i2	1407	-4.19	2.94484e-39	-3.68791	6.698e-36	-3.86751	0.00226317	PER2_ARATH	Peroxidase 2	GO:0006979;GO:0009664;GO:0009808;GO:0042744;GO:0098869;	GO:0004601;GO:0046872;GO:0020037;	GO:0009505;GO:0005576;	7e-91
Ds12591_c0_g1_i1	1375	-4.28918	1.00026e-25	-4.83103	2.07838e-30	-3.69127	0.00743588	PER5_VITVI	Peroxidase 5	GO:0006979;GO:0042744;	GO:0004601;GO:0046872;GO:0020037;	GO:0005576;	3e-116
Ds12591_c0_g1_i2	1375	-3.99165	7.41614e-23	-5.14674	6.73515e-30	-3.36632	0.0224122	PER5_VITVI	Peroxidase 5	GO:0006979;GO:0042744;	GO:0004601;GO:0046872;GO:0020037;	GO:0005576;	2e-116
Ds41993_c0_g1_i1	683	-3.42448	0.00141036	-5.88105	0.000187	-6.53892	0.0247372	POT6_ARATH	Potassium transporter 6	-	GO:0015079;	GO:0005886;GO:0016021;	4e-108
Ds23410_c0_g1_i2	2516	-2.66198	1.12145e-16	-0.944248	0.000356363	-3.28483	0.0346179	HCN1_MOUSE	Potassium/sodium hyperpolarization-activated cyclic nucleotide-gated channel 1	-	-	-	0.006
Ds48076_c0_g1_i2	1040	-2.35251	1.56247e-08	-1.60486	1.39406e-05	-4.31536	0.00179747	GUAA_HELHP	Probable GMP synthase [glutamine-hydrolyzing]	-	-	-	7e-18
Ds10269_c0_g1_i3	2691	-2.00734	1.65987e-14	-0.969456	4.82632e-05	-4.11878	0.0010816	NRX1_ARATH	Probable nucleoredoxin 1	GO:0046686;GO:0080092;GO:0010183;GO:0009860;GO:0045454;	GO:0047134;	GO:0005829;	3e-90
Ds10275_c0_g1_i2	1955	-3.70458	1.27658e-06	-2.20216	0.000254748	-4.67343	0.000334418	PHSB_ARATH	Probable polyamine transporter At1g31830	GO:0015846;GO:1902047;	GO:0015293;GO:0015203;GO:0015297;GO:0015171;	GO:0005886;GO:0016021;	0
Ds2652_c0_g1_i1	2244	-3.43575	1.5253e-18	-2.34447	1.54552e-12	-4.21953	0.00162887	P2C65_ARATH	Probable protein phosphatase 2C 65	-	GO:0004722;GO:0046872;	-	7e-99
Ds21442_c0_g1_i1	807	-1.42738	3.37462e-05	-1.0926	0.000672277	-1.96302	7.47987e-08	RUXF_ARATH	Probable small nuclear ribonucleoprotein F	GO:0000398;	GO:0003723;	GO:0005681;GO:0005732;	4e-27
Ds5269_c0_g1_i2	873	-3.82853	1.05991e-09	-1.78669	8.23111e-05	-3.502	0.0335491	XTH5_ARATH	Probable xyloglucan endotransglucosylase/hydrolase protein 5	GO:0010411;GO:0071555;GO:0042546;	GO:0016762;GO:0004553;	GO:0005618;GO:0048046;	4e-35
Ds19073_c0_g1_i2	1267	-2.58583	1.28239e-20	-1.59406	1.79056e-10	-3.27488	0.0223393	XTH8_ARATH	Probable xyloglucan endotransglucosylase/hydrolase protein 8	GO:0010411;GO:0071555;GO:0042546;	GO:0016762;GO:0004553;	GO:0005618;GO:0048046;	5e-138
Ds44915_c0_g1_i3	1151	-4.44116	2.98928e-24	-2.67019	1.93199e-15	-5.77463	2.26498e-06	PROD2_ARATH	Proline dehydrogenase 2, mitochondrial	GO:0009414;GO:0006970;GO:0010133;GO:0006562;	GO:0004657;	GO:0005739;	2e-32
Ds5956_c0_g1_i3	2139	-1.52544	9.2497e-09	-0.814526	0.00100698	-3.16143	0.0459354	SPA_SOLLC	Protein SPA, chloroplastic	-	-	GO:0016021;GO:0009535;	1e-26
Ds87001_c0_g2_i2	752	-5.78602	0.000187	-5.88105	0.000187	-5.76296	0.0247372	TPD1_ARATH	Protein TAPETUM DETERMINANT 1	GO:0001709;GO:0048653;	-	-	6e-08
Ds5469_c0_g2_i2	1000	-3.03782	1.50761e-06	-2.66947	7.45832e-06	-4.13281	0.0122878	CRK23_ARATH	Putative cysteine-rich receptor-like protein kinase 23	GO:0006468;GO:0042742;	GO:0004674;GO:0005524;	GO:0009506;GO:0005886;GO:0016021;	2e-06
Ds85681_c0_g1_i2	1175	-3.21309	1.71663e-16	-0.929936	0.00123145	-3.6555	0.00824488	ATL78_ARATH	RING-H2 finger protein ATL78	GO:0016567;	GO:0008270;	GO:0016021;	1e-43
Ds33461_c0_g3_i1	2779	-2.05099	2.05119e-05	-1.31806	0.00123242	-4.43911	0.00275622	ACCR1_ARATH	Serine/threonine-protein kinase-like protein CCR1	-	GO:0004674;GO:0004672;GO:0042803;GO:0005524;	GO:0016021;	0
Ds79598_c0_g1_i3	1348	-3.1338	5.09436e-18	-2.59703	5.0004e-15	-4.20439	0.00101881	TRL12_ARATH	Thioredoxin-like 1-2, chloroplastic	GO:0000103;GO:0006457;GO:0055114;GO:0006662;GO:0034599;GO:0045454;	GO:0015035;GO:0016671;	GO:0009507;	2e-62
Ds56236_c0_g1_i2	1921	-1.52599	1.2255e-09	-0.776721	0.00100752	-4.01472	0.00152424	BH063_ARATH	Transcription factor bHLH63	GO:0006351;GO:0009637;GO:0009911;GO:0009908;	GO:0003700;GO:0003677;	GO:0005634;	5e-45
Ds21443_c0_g3_i2	934	-1.61084	0.00108952	-2.32	1.34762e-05	-4.90133	0.00233063	PRE6_ARATH	Transcription factor PRE6	GO:0006351;GO:0009416;GO:0006355;GO:0040008;	-	GO:0005634;GO:0005737;	1e-23
Ds17501_c0_g1_i1	1408	-2.3594	6.40444e-05	-1.70116	0.000878105	-3.54833	0.000211324	TDM1A_MOUSE	Transmembrane epididymal protein 1A	-	-	-	0.005
Ds70013_c0_g1_i1	774	-1.99003	1.70338e-06	-1.69059	1.27444e-05	-4.80392	0.00041579	TBB3_MAIZE	Tubulin beta-3 chain	GO:0007017;	GO:0005200;GO:0003924;GO:0005525;	GO:0005874;GO:0005737;	4e-93
Ds20390_c0_g1_i1	872	-1.62677	7.28468e-08	-1.65993	2.77079e-08	-3.56601	0.00721056	TBB4_ARATH	Tubulin beta-4 chain	GO:0007017;	GO:0005200;GO:0003924;GO:0005525;	GO:0045298;GO:0009506;GO:0005886;GO:0005874;GO:0005794;GO:0005829;GO:0009570;GO:0005618;GO:0048046;	2e-92
Ds20390_c0_g1_i2	872	-1.66433	5.97348e-07	-1.78152	3.86454e-08	-5.21062	1.92517e-05	TBB4_ARATH	Tubulin beta-4 chain	GO:0007017;	GO:0005200;GO:0003924;GO:0005525;	GO:0045298;GO:0009506;GO:0005886;GO:0005874;GO:0005794;GO:0005829;GO:0009570;GO:0005618;GO:0048046;	2e-92
Ds774_c0_g1_i1	677	-1.65285	7.39908e-07	-1.80727	2.83478e-08	-3.274	0.0162175	TBB7_GOSHI	Tubulin beta-7 chain	GO:0007017;	GO:0005200;GO:0003924;GO:0005525;	GO:0005874;GO:0005737;	1e-71
Ds63511_c0_g1_i1	1967	-3.17731	5.72781e-23	-1.37976	1.26051e-07	-3.34647	0.0245774	YHU2_SCHPO	Uncharacterized threonine-rich GPI-anchored glycoprotein PJ4664.02	-	-	-	6e-06
Ds39462_c0_g1_i1	1510	-7.65987	1.49345e-13	-2.75768	1.40873e-07	-6.24521	7.46712e-05	WTR11_ARATH	WAT1-related protein At1g70260	GO:0006810;GO:0055085;	GO:0022857;	GO:0005886;GO:0016021;	2e-71
Ds31392_c0_g2_i1	782	-3.81823	2.94037e-16	-1.53657	3.23032e-06	-4.38707	0.000493047	XTH2_SOYBN	Xyloglucan endotransglucosylase/hydrolase 2	GO:0010411;GO:0042546;	GO:0016762;GO:0004553;	GO:0005618;GO:0048046;	3e-80
Ds10706_c0_g2_i2	576	-3.49804	2.34787e-09	-4.07151	1.63327e-10	-3.44315	0.0194543	-	-	-	-	-	-
Ds11568_c0_g1_i1	594	-6.14277	1.54285e-05	-3.95404	0.000142819	-7.45833	0.00775628	-	-	-	-	-	-
Ds11760_c0_g1_i1	1189	-3.64346	2.55973e-19	-1.64783	7.10491e-08	-4.62402	0.000201718	-	-	-	-	-	-
Ds12798_c0_g1_i1	737	-3.02134	1.38026e-20	-0.954892	0.000204331	-3.80952	0.00163591	-	-	-	-	-	-
Ds12999_c0_g1_i2	1094	-3.72741	9.22082e-13	-2.58173	1.94338e-09	-3.82051	0.00795067	-	-	-	-	-	-
Ds13991_c0_g2_i1	699	-5.2425	1.09179e-23	-2.59281	3.86548e-13	-3.11771	0.0298353	-	-	-	-	-	-
Ds17511_c0_g1_i2	1377	-1.50463	0.00133912	-1.43704	0.001266	-5.56847	0.000557523	-	-	-	-	-	-
Ds19047_c0_g1_i2	1389	-2.87148	9.8127e-30	-1.18186	1.3481e-07	-3.1798	0.0301226	-	-	-	-	-	-
Ds25887_c0_g1_i1	819	-1.87161	0.000877812	-3.01696	6.16451e-06	-6.41574	0.000285934	-	-	-	-	-	-
Ds26246_c0_g3_i2	1466	-1.79515	1.9158e-07	-1.72663	2.36142e-07	-3.7176	0.00839835	-	-	-	-	-	-
Ds27499_c0_g1_i3	677	-2.86269	5.27287e-16	-2.69621	1.68272e-15	-6.12388	4.93417e-07	-	-	-	-	-	-
Ds27855_c0_g1_i1	491	-6.61097	4.1078e-07	-4.42261	1.5797e-06	-4.12994	0.0189423	-	-	-	-	-	-
Ds34035_c0_g1_i1	387	-2.08574	0.00664724	-2.65842	0.000910749	-4.64298	0.00630988	-	-	-	-	-	-
Ds3494_c0_g1_i2	1743	-1.46077	0.000102124	-1.70902	7.63722e-06	-5.2984	0.000131847	-	-	-	-	-	-
Ds36203_c0_g1_i1	607	-1.40183	1.75413e-06	-1.41491	9.57897e-07	-4.16226	0.000338729	-	-	-	-	-	-
Ds37594_c0_g1_i4	1928	-1.60254	0.000764908	-1.696	0.000219377	-4.39232	0.00691918	-	-	-	-	-	-
Ds41404_c0_g1_i3	842	-3.79406	4.53154e-07	-1.94057	0.000608709	-3.91541	0.0222167	-	-	-	-	-	-
Ds4498_c0_g1_i1	907	-2.32689	1.31484e-09	-1.05135	0.00105701	-4.8483	0.000150776	-	-	-	-	-	-
Ds45177_c0_g2_i2	1045	-2.16267	1.98164e-05	-1.73	0.000218753	-4.22517	0.00467992	-	-	-	-	-	-
Ds47887_c0_g1_i1	2264	-2.2434	4.92361e-08	-1.27796	0.000306909	-3.63443	0.0218735	-	-	-	-	-	-
Ds55204_c0_g1_i2	1652	-1.78938	1.39306e-12	-1.31764	4.17329e-08	-4.96928	2.15582e-05	-	-	-	-	-	-
Ds58939_c0_g2_i1	456	-6.14277	1.54285e-05	-3.1103	0.000700954	-7.87372	0.00775628	-	-	-	-	-	-
Ds59963_c0_g1_i2	2265	-3.12549	1.05674e-05	-2.15523	0.000382556	-5.6744	0.000463122	-	-	-	-	-	-
Ds64953_c0_g1_i2	635	-2.26316	7.7493e-08	-1.91	9.16076e-07	-6.02422	1.76464e-05	-	-	-	-	-	-
Ds69260_c0_g1_i2	728	-1.27117	5.02449e-09	-0.830437	9.7553e-05	-3.81299	0.000891184	-	-	-	-	-	-
Ds82789_c0_g1_i1	1911	-2.43986	1.58775e-09	-1.06199	0.00118799	-4.20555	0.00291884	-	-	-	-	-	-

## Sheet: Table S3
Table S3. List of qRT-PCR primers
primer name	primer sequence (5'-3')
DsATHB7-qF (Ds70933)	GAGGTTTAGCGACGAGCAAGT
DsATHB7-qR (Ds70933)	GCACCTTCTTCTTTGGCTCC
DsDREB3-qF (Ds3834)	CCACTTCAACTTCATCGTCCCA
DsDREB3-qR (Ds3834)	GCGGATTTCAGACACCCACTT
DsAI5L3-qF (Ds5529)	TTCTGTGAGTGGAATGCCTGA
DsAI5L3-qR (Ds5529)	ACTCATTGTGGTATGCCTGCTT
DsBBX32-qF (Ds85781)	TTGCGACGATAAAGTCCACC
DsBBX32-qR (Ds85781)	GTCGTCTTCAAACCCAGCGT
DsMYB39-qF (Ds81529)	TCCACTAACGGGTCGTCCTC
DsMYB39-qR (Ds81529)	CAAATCACTGTTTCCGTCGTCT
DsASR1-qF (Ds38120)	GCCCGAAGGCACAAGATAGAA
DsASR1-qR (Ds38120)	TCCTCACGGTCCTCCTTAGATT
DsPP2C16-qF (Ds18525)	CGTCATCCTCCTCCACAATCT
DsPP2C16-qR (Ds18525)	CCAATCACCGTCTTGAAACCC
DsHSP17-qF (Ds21949)	TCAGTAGTCCTTATTTCCGTCCA
DsHSP17-qR (Ds21949)	ACCACTTCCTTTGCGAATCTTA
DsSEP2-qF (Ds45944)	TTAGCGATGGTGGAGACGAG
DsSEP2-qR (Ds45944)	CACCGAGTTTCCTGTTGCTAA
DsCOR47-qF (Ds21175)	ACGTGTCGGCCACTACTCCA
DsCOR47-qR (Ds21175)	GGGACTAAGCCCAGGGATTT
DsTIL-qF (Ds13702)	GAGGAAGCCAAGTTCAAGGTTA
DsTIL-qR (Ds13702)	TGCTCCCTGTAAAGAACCCAC
DsPTR33-qF (Ds85010)	ACTCCAAAGTCGCCCTCAAA
DsPTR33-qR (Ds85010)	AGCGGCGTATGGTTTAGTCG
DsSWET1-qF (Ds10054)	CAAAGCATTCCCTATGTGGTG
DsSWET1-qR (Ds10054)	TAGTTTGCTTGTCGGCGTAGA
DsSWET16-qF (Ds2741)	CATCAATGGTTTCGGTGTTCT
DsSWET16-qR (Ds2741)	TGACGCCCTTGTAACGCTAA
DsUP1-qF (Ds53675)	ATGGGCACTAAGGAGCAGAAT
DsUP1-qR (Ds53675)	GACCACGACAGCACTCAAAGA
DsUP2-qF (Ds33500)	AGAAGCCGAACTATCAACGCC
DsUP2-qR (Ds33500)	GGAGCCCTTCCTACAACCAT
DsActin7-qF (Ds66780)	CGGTGGCTCTATCCTCGCTT
DsActin7-qR (Ds66780)	TTCCTGTGGACGATTGACGG
